# Supplementary material for: Synaptic proteins in CSF as potential novel biomarkers for prognosis in prodromal Alzheimer’s disease
Source: Springer Nature journal article supplement (doi:10.1186/s13195-017-0335-x), 2018-01-15
Supplement: MOESM1 [file 15448892]

Figure S1 Levels of bovine serum albumin per diagnostic group and PRM run

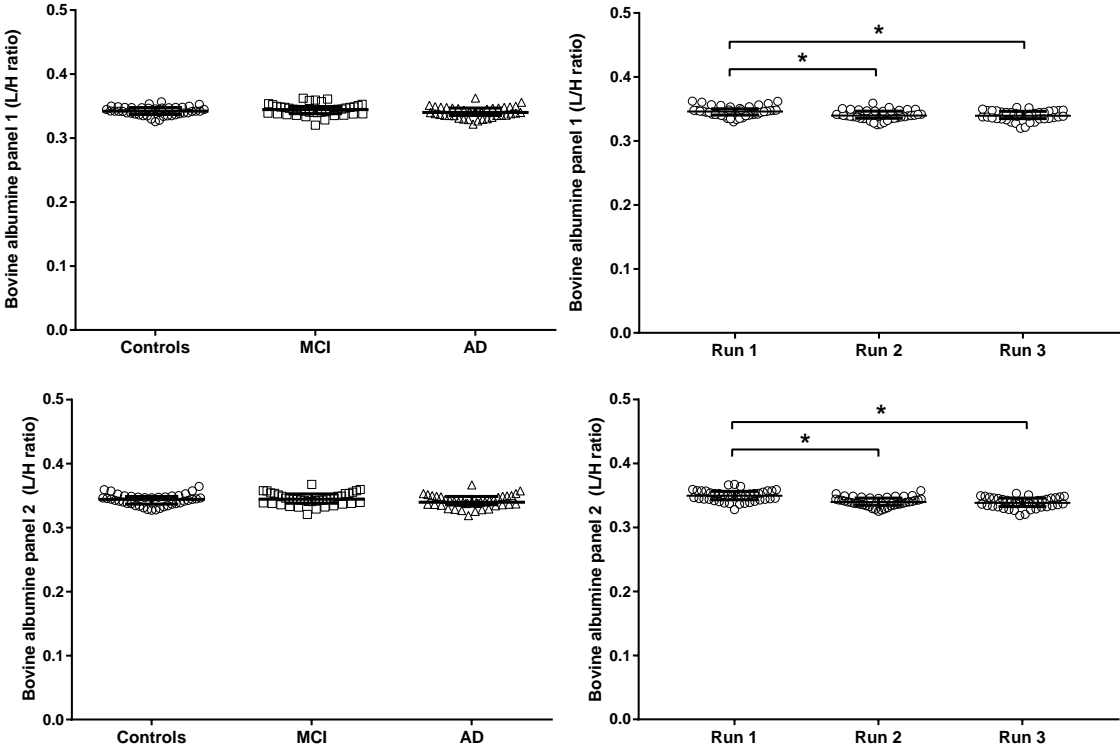

\* p < 0.01
